# Supplementary material for: Brief communication: Landslide activity on the Argentinian Santa Cruz River mega dam works confirmed by PSI DInSAR
Source: Copernicus journal article supplement (doi:10.5194/nhess-23-1987-2023), 2023-06-01
Supplement: Supplementary file [file nhess-23-1987-2023-supplement-title-page.pdf › nhess-23-1987-2023-supplement-title-page.pdf]

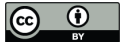

*Supplement of*

**Brief communication: Landslide activity on the Argentinian Santa Cruz River mega dam works confirmed by PSI DInSAR**

**Guillermo Tamburini-Beliveau et al.**

*Correspondence to:* Guillermo Tamburini-Beliveau ([guitambe@fceia.unr.edu.ar](mailto:guitambe@fceia.unr.edu.ar))

- [nhess-23-1987-2023-supplement-title-page.pdf](#)
- [NHESS\\_SantaCruz\\_river\\_PSI.dbf](#)
- [NHESS\\_SantaCruz\\_river\\_PSI.prj](#)
- [NHESS\\_SantaCruz\\_river\\_PSI.shp](#)
- [NHESS\\_SantaCruz\\_river\\_PSI.shx](#)

The copyright of individual parts of the supplement might differ from the article licence.
